# Supplementary material for: Facile solid-phase synthesis of the diammoniate of diborane and its thermal decomposition behavior
Source: Royal Society of Chemistry journal article supplement (doi:10.1039/c1cp00018g), 2011-01-01
Supplement: c1cp00018g.pdf [file c1cp00018g.pdf]

## Electronic Supplementary Information

For

### “Facile solid-phase synthesis of diammoniate of diborane and its thermal decomposition behaviors”

Zhanzhao Fang,<sup>a</sup> Junhong Luo,<sup>a</sup> Xiangdong Kang,<sup>a</sup> Haijie Xia,<sup>a</sup> Sisheng Wang,<sup>b</sup> Wen Wen,<sup>b</sup> Xingtai Zhou<sup>b</sup> and Ping Wang<sup>\*a</sup>

<sup>a</sup>*Shenyang National Laboratory for Materials Science, Institute of Metal Research, Chinese Academy of Sciences, Shenyang 110016, China*

<sup>b</sup>*Shanghai Synchrotron Radiation Facility, Shanghai Institute of Applied Physics, Chinese Academy of Sciences, Shanghai 201204, China*

\* Author to whom correspondence should be addressed.

E-mail: pingwang@imr.ac.cn

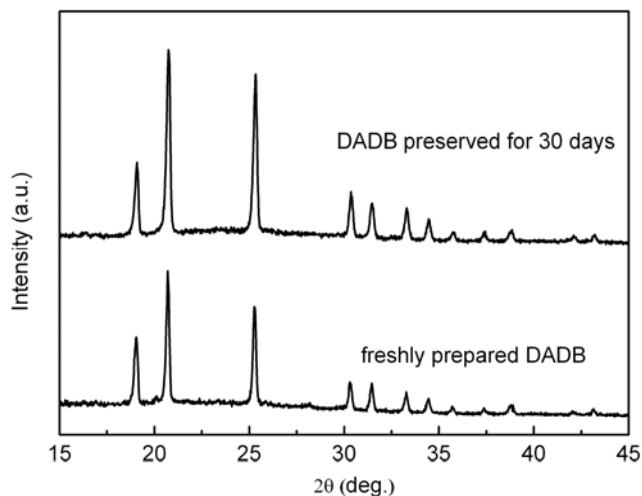

**Fig. S1.** XRD patterns of the DADB samples that were freshly prepared and preserved for 30 days, respectively.

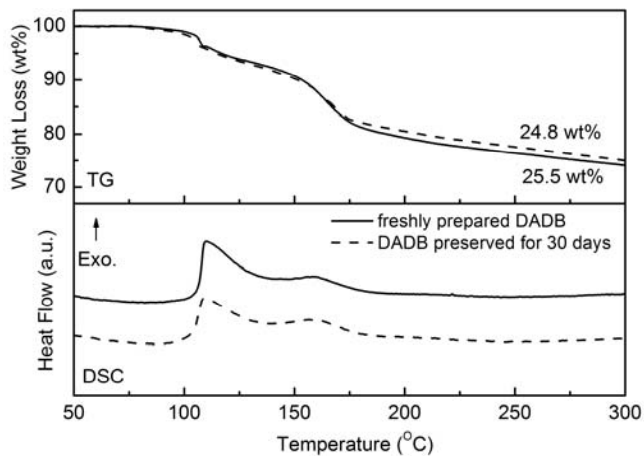

**Fig. S2.** Comparison of TG/DSC profiles of the DADB samples that were freshly prepared and preserved for 30 days, respectively. The heating rate was  $5\text{ }^{\circ}\text{C min}^{-1}$ .

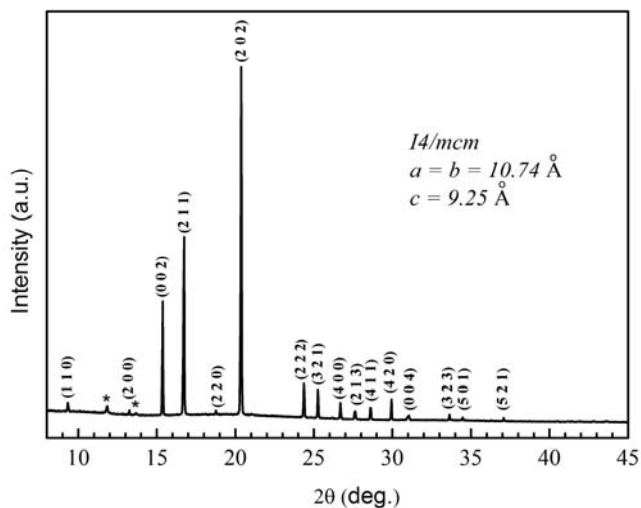

**Fig. S3.** Synchrotron X-ray diffraction pattern of pure DADB sample. The XRD data was analyzed by the CMPR program (B. H. Toby, *J. Appl. Crystallogr.*, 2005, **38**, 1040). The diffraction peaks marked with asterisks might result from unknown phase in the purified sample.

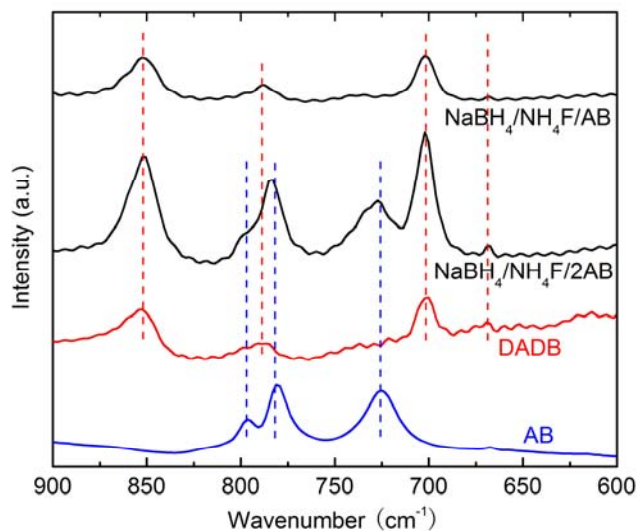

**Fig. S4.** The FTIR patterns (B-N stretching vibration region) of the  $\text{NaBH}_4/\text{NH}_4\text{F}/\text{AB}$  and  $\text{NaBH}_4/\text{NH}_4\text{F}/2\text{AB}$  samples after milling for 20 min. For comparison, the FTIR patterns of DADB and AB were also included.

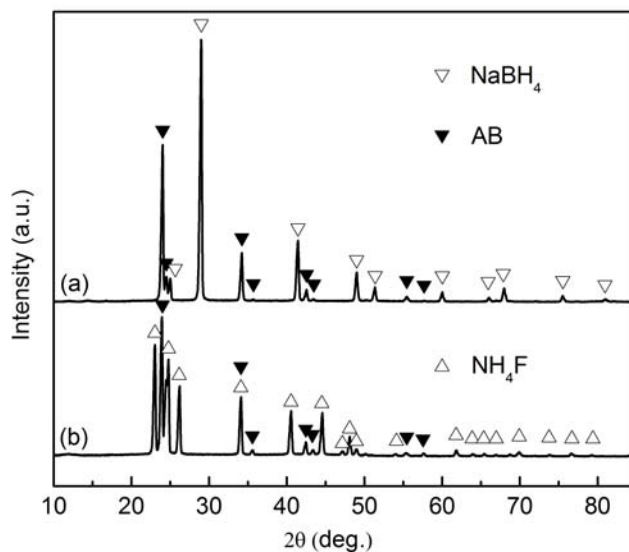

**Fig. S5.** XRD patterns of the samples after milling for 20 min: (a)  $\text{NaBH}_4 + \text{AB}$ ; (b)  $\text{NH}_4\text{F} + \text{AB}$ .

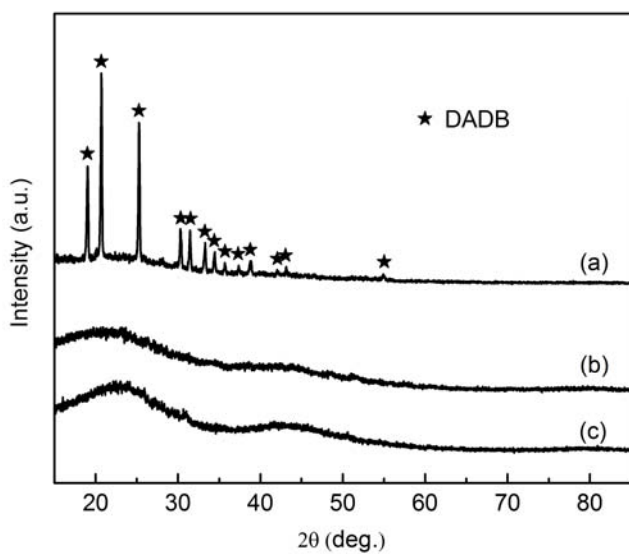

**Fig. S6.** XRD patterns of (a) pristine DADB and post-heated DADB samples at (b) 130 °C and (c) 300 °C.

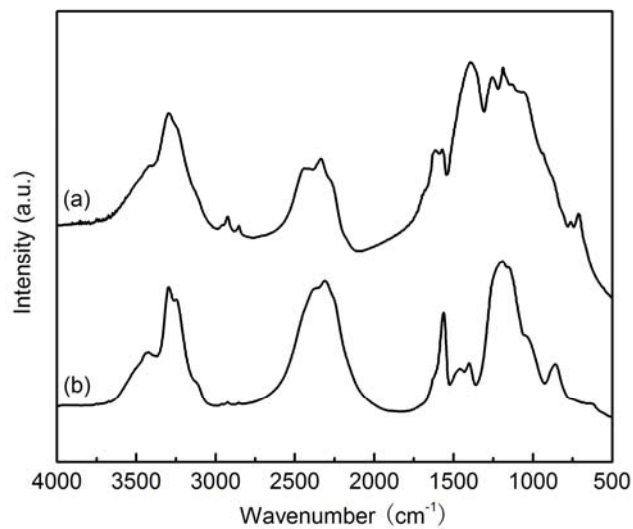

**Fig. S7.** FTIR patterns of (a) post-heated DADB sample at 130 °C and (b) PAB.

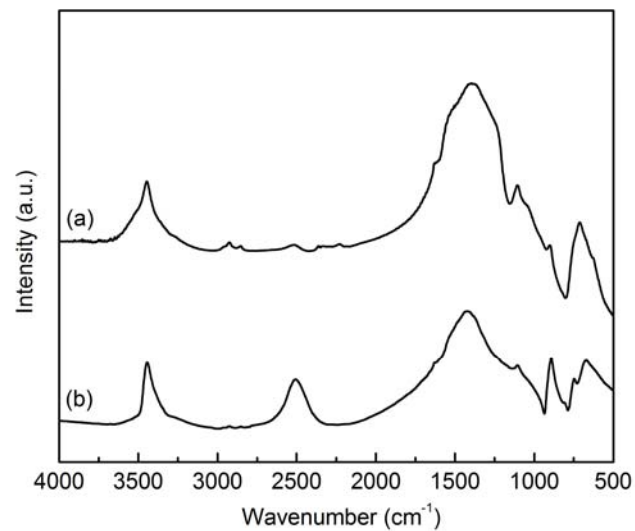

**Fig. S8.** FTIR patterns of (a) post-heated DADB sample at 300 °C and (b) PIB.

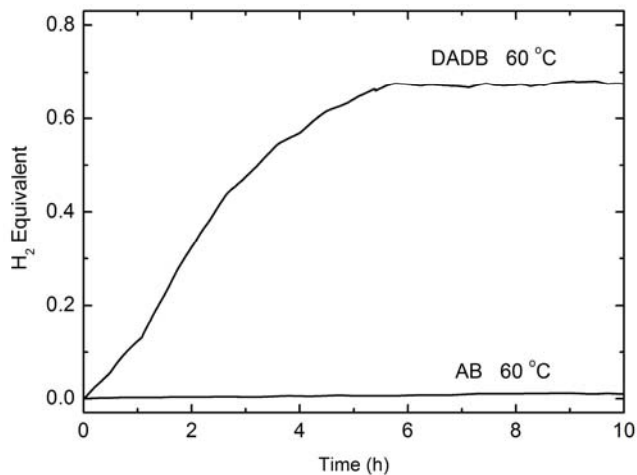

**Fig. S9.** Isothermal decomposition profiles of DADB and AB at 60 °C by using volumetric method.

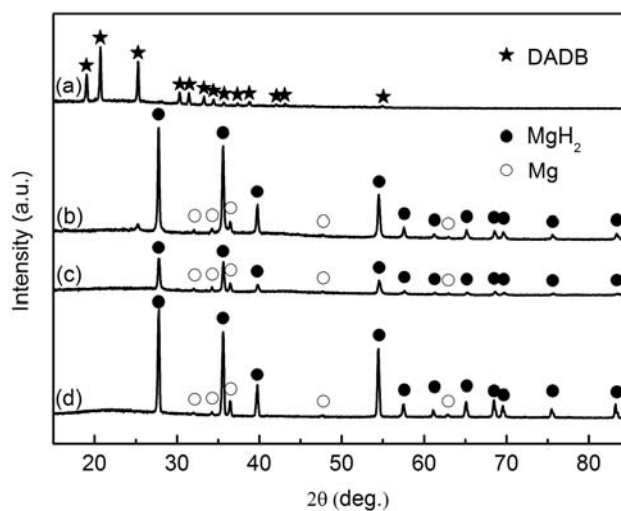

**Fig. S10.** XRD patterns of (a) DADB; (b) post-milled DADB/MgH<sub>2</sub> sample; (c) post-heated DADB/MgH<sub>2</sub> sample at 300 °C and (d) MgH<sub>2</sub> starting material containing a small amount of Mg.

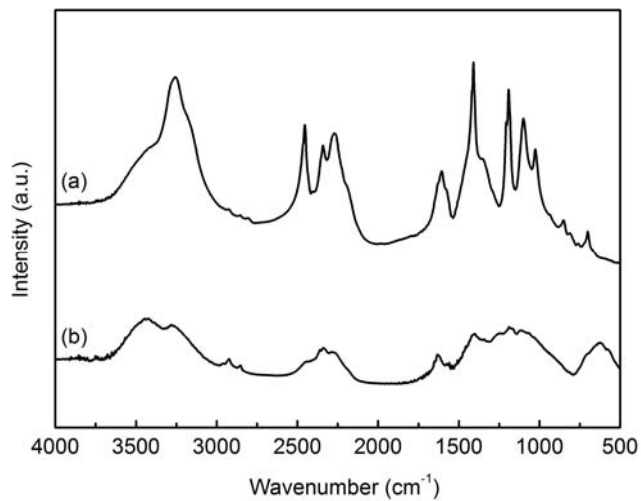

**Fig. S11.** FTIR patterns of (a) DADB and (b) post-milled DADB/MgH<sub>2</sub> samples.
